# Supplementary material for: The Long Non-Coding RNA H19 Drives the Proliferation of Diffuse Intrinsic Pontine Glioma with H3K27 Mutation
Source: MDPI journal article supplement (doi:10.3390/ijms22179165), 2021-08-25
Supplement: s1 [file s1]

**Supplementary Table S1.** Clinical characteristics of DIPG cell models.

| Cell line   | Sex    | Age | Sequence variation                       |
|-------------|--------|-----|------------------------------------------|
| SU-DIPG-IV  | Female | 2Y  | HIST1H3B p.Lys28Met (c.83A>T) (H3.1K27M) |
| VUMC-DIPG-A | Female | 3Y  | H3F3A p.Lys28Met (c.83A>T) (H3.3K27M)    |
